# Supplementary material for: RNA sequencing-based longitudinal transcriptomic profiling gives novel insights into the disease mechanism of generalized pustular psoriasis
Source: PubMed Central journal article supplement (PMC5989375; doi:10.1186/s12920-018-0369-3), 2018-06-05
Supplement: 12920_2018_369_MOESM5_ESM.pdf [file 12920_2018_369_MOESM5_ESM.pdf]

A

T1 vs T0

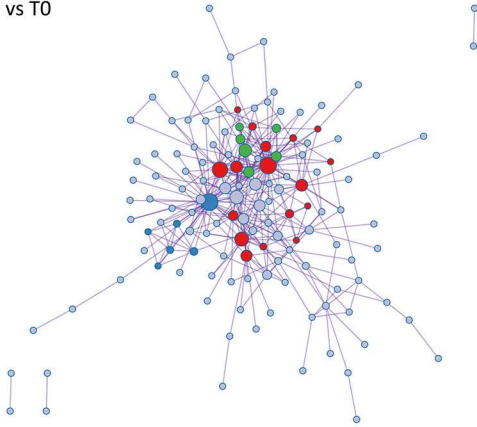

| Color | MCODE   | GO            | Description                                                          | Log10(P) |
|-------|---------|---------------|----------------------------------------------------------------------|----------|
| Red   | MCODE_1 | GO:0045055    | regulated exocytosis                                                 | -20.1    |
| Red   | MCODE_1 | GO:0002366    | leukocyte activation involved in immune response                     | -14.5    |
| Red   | MCODE_1 | GO:0002263    | cell activation involved in immune response                          | -14.5    |
| Blue  | MCODE_2 | R-HSA-444473  | Formyl peptide receptors bind formyl peptides and many other ligands | -13.0    |
| Blue  | MCODE_2 | R-HSA-375276  | Peptide ligand-binding receptors                                     | -12.5    |
| Blue  | MCODE_2 | R-HSA-373076  | Class A/1 (Rhodopsin-like receptors)                                 | -11.0    |
| Green | MCODE_3 | R-HSA-6798695 | Neutrophil degranulation                                             | -10.0    |
| Green | MCODE_3 | GO:0043312    | neutrophil degranulation                                             | -10.0    |
| Green | MCODE_3 | GO:0002283    | neutrophil activation involved in immune response                    | -10.0    |

B

T2 vs T0

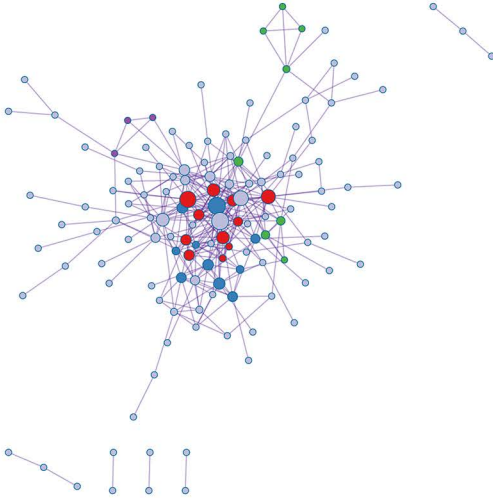

| Color  | MCODE   | GO            | Description                                                                  | Log10(P) |
|--------|---------|---------------|------------------------------------------------------------------------------|----------|
| Red    | MCODE_1 | GO:0045055    | regulated exocytosis                                                         | -16.3    |
| Red    | MCODE_1 | R-HSA-354192  | Integrin alphaIIb beta3 signaling                                            | -15.1    |
| Red    | MCODE_1 | R-HSA-9006921 | Integrin signaling                                                           | -15.1    |
| Blue   | MCODE_2 | GO:0045055    | regulated exocytosis                                                         | -12.3    |
| Blue   | MCODE_2 | GO:0002274    | myeloid leukocyte activation                                                 | -8.9     |
| Blue   | MCODE_2 | GO:0002366    | leukocyte activation involved in immune response                             | -8.6     |
| Green  | MCODE_3 | GO:0002274    | myeloid leukocyte activation                                                 | -10.0    |
| Green  | MCODE_3 | GO:0042119    | neutrophil activation                                                        | -8.5     |
| Green  | MCODE_3 | GO:0036230    | granulocyte activation                                                       | -8.5     |
| Purple | MCODE_4 | GO:0002755    | MyD88-dependent toll-like receptor signaling pathway                         | -8.4     |
| Purple | MCODE_4 | R-HSA-975138  | TRAF6 mediated induction of NFkB and MAP kinases upon TLR7/8 or 9 activation | -7.2     |
| Purple | MCODE_4 | R-HSA-16R181  | Toll Like Receptor 7/8 (TLR7/8) Cascade                                      | -7.1     |
