# Supplementary material for: RNA sequencing-based longitudinal transcriptomic profiling gives novel insights into the disease mechanism of generalized pustular psoriasis
Source: PubMed Central journal article supplement (PMC5989375; doi:10.1186/s12920-018-0369-3), 2018-06-05

■ T1 vs T0 ■ T2 vs T0

$-\log(\text{FDR})$

0 1 2 3 4 5 6 7 8 9 10 11 12 13 14 15 16

Threshold

Innate immunity genes

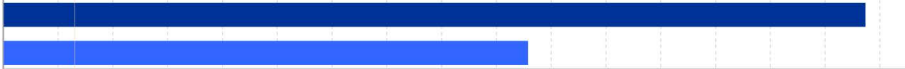

Adaptive immunity genes

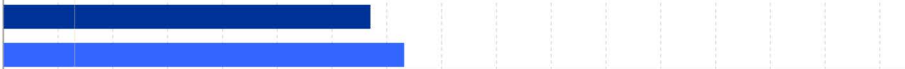

Supplement: 12920_2018_369_MOESM8_ESM.pdf [file 12920_2018_369_MOESM8_ESM.pdf]
