# Supplementary material for: RNA sequencing-based longitudinal transcriptomic profiling gives novel insights into the disease mechanism of generalized pustular psoriasis
Source: PubMed Central journal article supplement (PMC5989375; doi:10.1186/s12920-018-0369-3), 2018-06-05

A

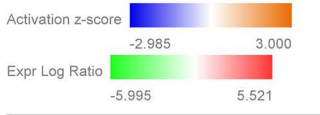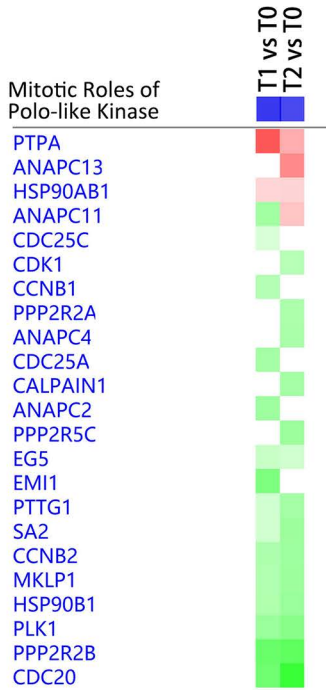

B

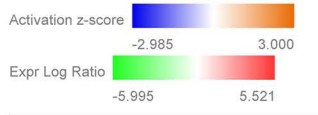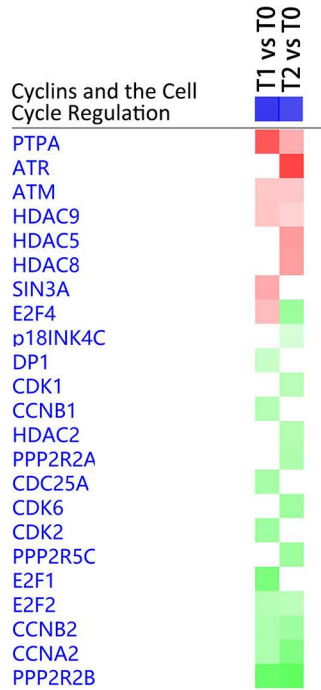

C

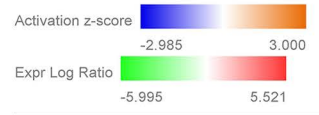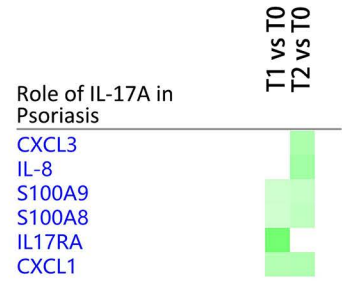

Supplement: 12920_2018_369_MOESM9_ESM.pdf [file 12920_2018_369_MOESM9_ESM.pdf]
